# Supplementary material
Source: Springer Nature journal article supplement (https://www.springermedizin.de/resource/supplementary/12943_2009_566_MOESM17_ESM.pdf/9554984)

(a) **EMILIN2 F**  
 -407 →  
 GAATGAGTCATTGGAAATGCTGTAAC**CG**TAGACCCTTATCCCAAACCCTTT**CG**CCCCCTCCACCC**CG**AGCCCCCTGC**CG**AGAAG**CG**AAGGGAC  
 5 6 7 8 9 10  
 TGGAGAC**CG**GGGAGACTTGGTGGGGGGAGAGTCA**CG**TTT**CG**GAGAGGGGAAGTGAAATAAAGAGGG**CG**GCACC**CG**GGGGGACCTGTG**CG**TCAT  
 11 12 13 14 15 16 17 18 19  
 TGAGGGAC**CG**GGGAGAAG**CG**CAGGG**CG**CAC**CG**GGGCTGCAGAAGGAGAAGTAGGAA**CG**AGAAG**CG**GAGGGGG**CG**GC**CG**CGGAGCACTGGTT  
 20 21 22 23 24 25 26 27 28 29 30 31 32 33 34 35  
 GGAG**CG**C**CG**CGAAG**CG**C**CG**AGCCTCTTGCCTT**CG**CGGG**CG**CGCCCTGGC**CG**C**CG**GCAGCCTTGTGGC**CG**GTGCC**CG**A**CG**AT**CG**C**CG**CGCT  
 36 37 38 39 40 41 42 43 44  
 C**CG**GACCC**CG**GGCAGG**CG**GGG**CG**CGCC**CG**CTG**CG**CGCGGGATGTGGCAGCC**CG**AGAC**CG**GCCTGGCCCC**CG**CGTGCCCTGG**CG**CTGGG**CG**CTGG  
 ←  
 +110  
**EMILIN2 RN**  
**CG**CTGCTGGCCCTGGTTGG**CG**CGGGGCTGTGCC**CG**CGGCC**CG**CAGCC**CG**GGTATCC

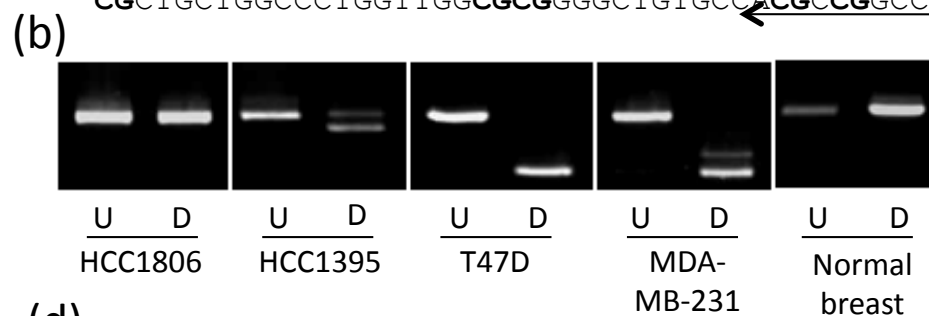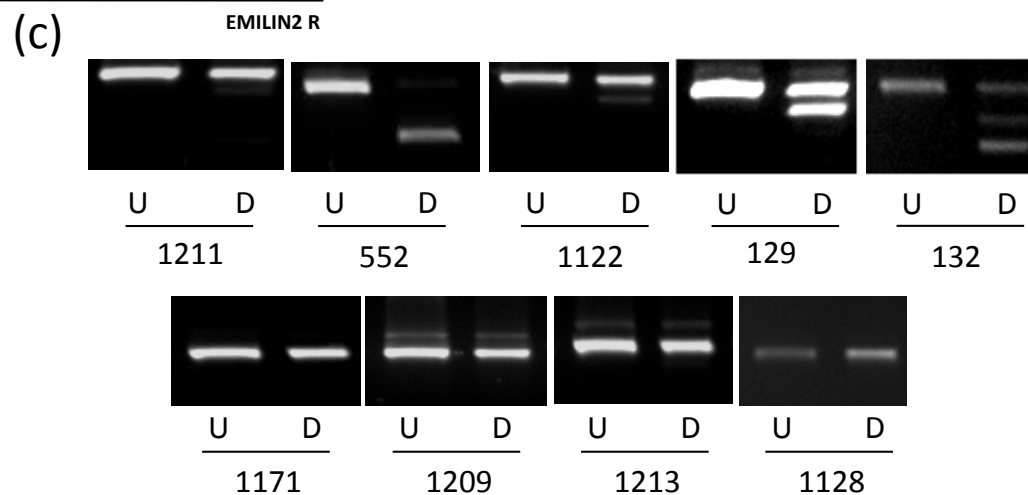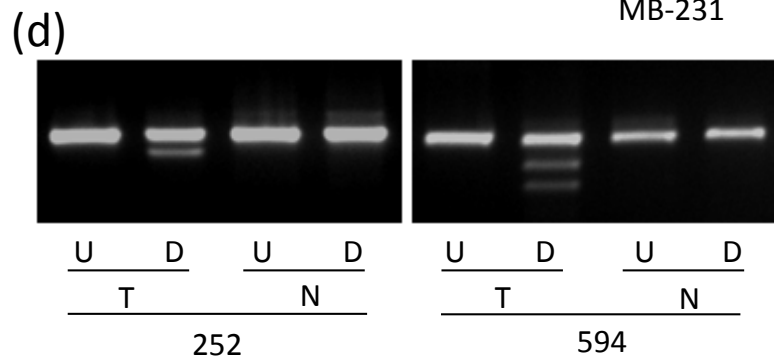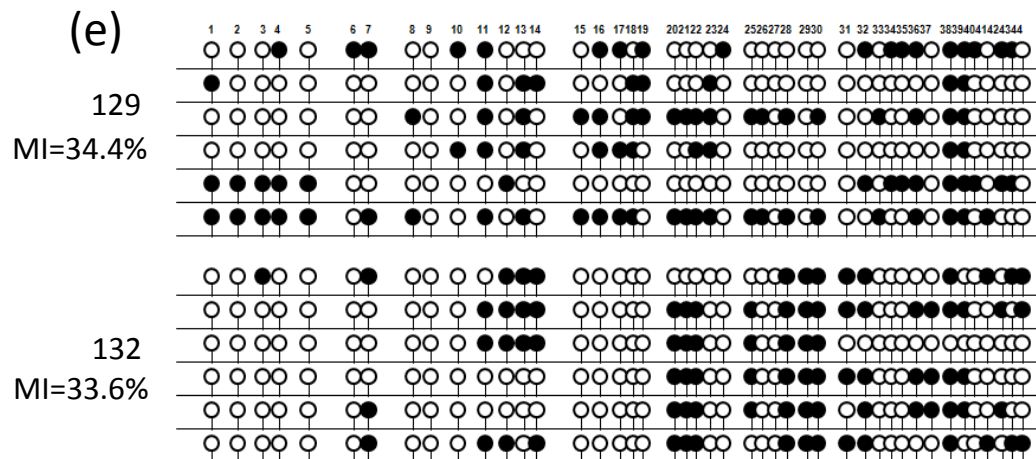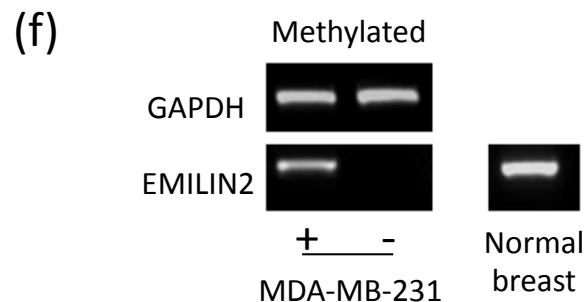

Supplement: MOESM17 [file 9554984]
